# Supplementary material for: A Novel Glass Fiber Coated with Sol–Gel Poly-Diphenylsiloxane Sorbent for the On-Line Determination of Toxic Metals Using Flow Injection Column Preconcentration Platform Coupled with Flame Atomic Absorption Spectrometry
Source: MDPI journal article supplement (doi:10.3390/molecules26010009), 2020-12-22
Supplement: s1 [file s1]

*Supplementary Material*

Caption of Figures:

**Figure S1.** Preparation of the microcolumn packed with sol-gel PDPS coated glass fiber: a) cutting of glass fibers; b) packing with GF coated with sol-gel PDPS.

**Figure S2.** Installation of the GFSE microcolumn in the FIAS-400 system.

**Figure S3.** Effect of sample flow rate on the absorbance of  $100.0 \mu\text{g}\cdot\text{L}^{-1}$  Pb(II) and  $100.0 \mu\text{g}\cdot\text{L}^{-1}$  Cr(VI). All other experimental parameters as in Table 1.

**Figure S4.** Effect of elution flow rate on the absorbance of  $100.0 \mu\text{g}\cdot\text{L}^{-1}$  Pb(II) and  $100.0 \mu\text{g}\cdot\text{L}^{-1}$  Cr(VI). All other experimental parameters as in Table 1.

**Figure S5.** Effect of preconcentration time on the absorbance of  $100.0 \mu\text{g}\cdot\text{L}^{-1}$  Pb(II) and  $100.0 \mu\text{g}\cdot\text{L}^{-1}$  Cr(VI). All other experimental parameters as in Table 1.

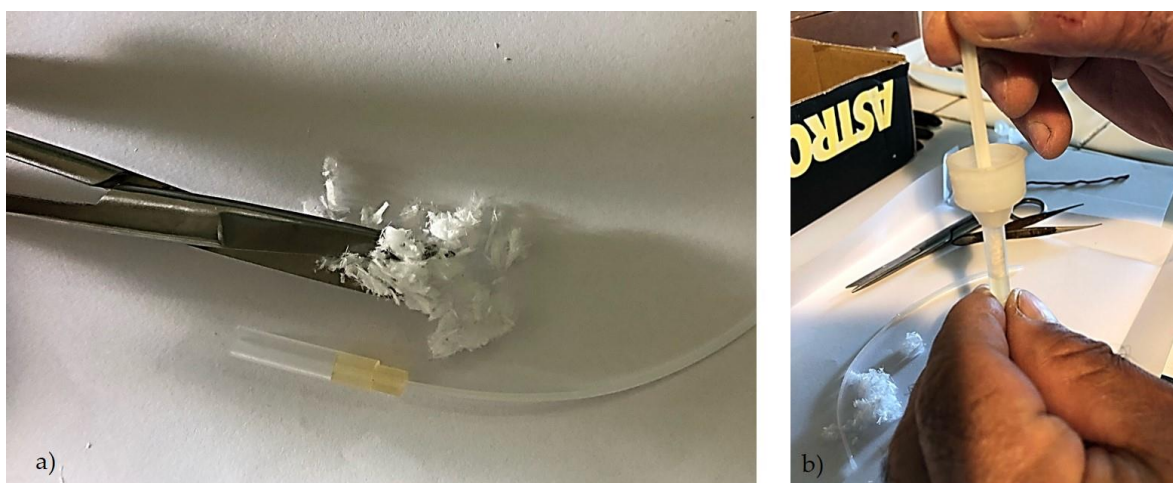

**Figure S1.** Preparation of the microcolumn packed with sol-gel PDPS coated glass fiber: a) cutting of glass fibers; b) packing with GF coated with sol-gel PDPS.

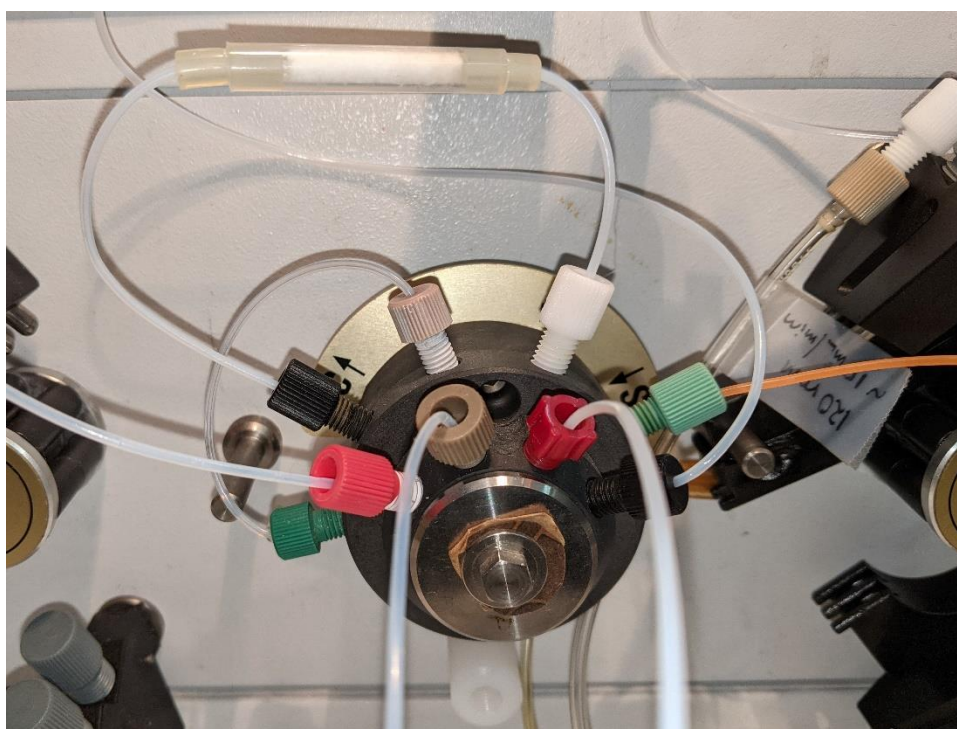

**Figure S2.** Installation of the GFSE microcolumn in the FIAS-400 system.

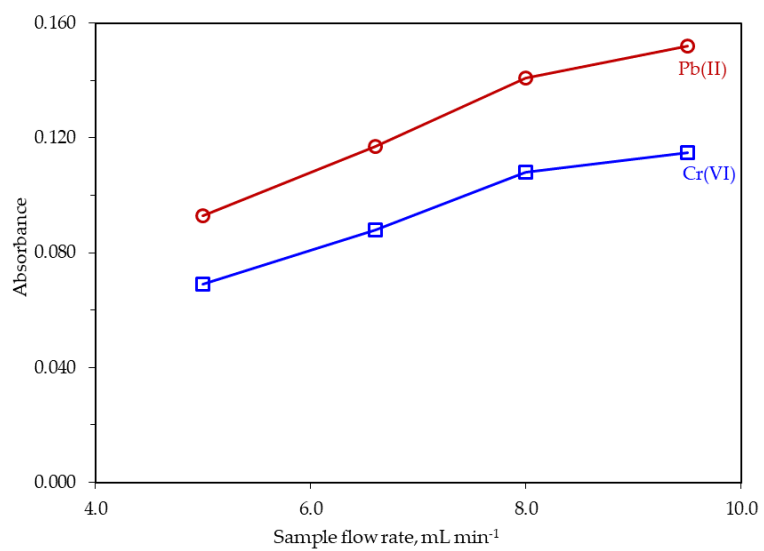

**Figure S3.** Effect of sample flow rate on the absorbance of 100.0 µg·L<sup>-1</sup> Pb(II) and 100.0 µg·L<sup>-1</sup> Cr(VI). All other experimental parameters as in Table 1.

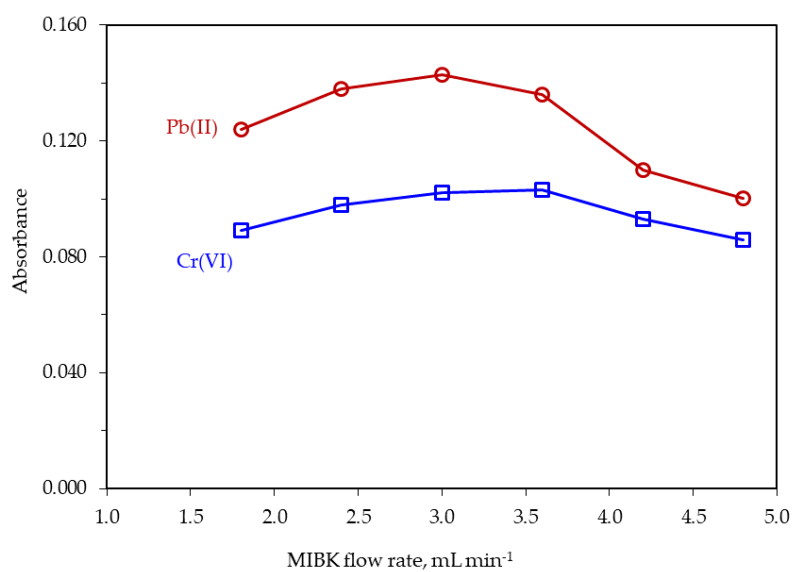

**Figure S4.** Effect of elution flow rate on the absorbance of 100.0  $\mu\text{g}\cdot\text{L}^{-1}$  Pb(II) and 100.0  $\mu\text{g}\cdot\text{L}^{-1}$  Cr(VI). All other experimental parameters as in Table 1.

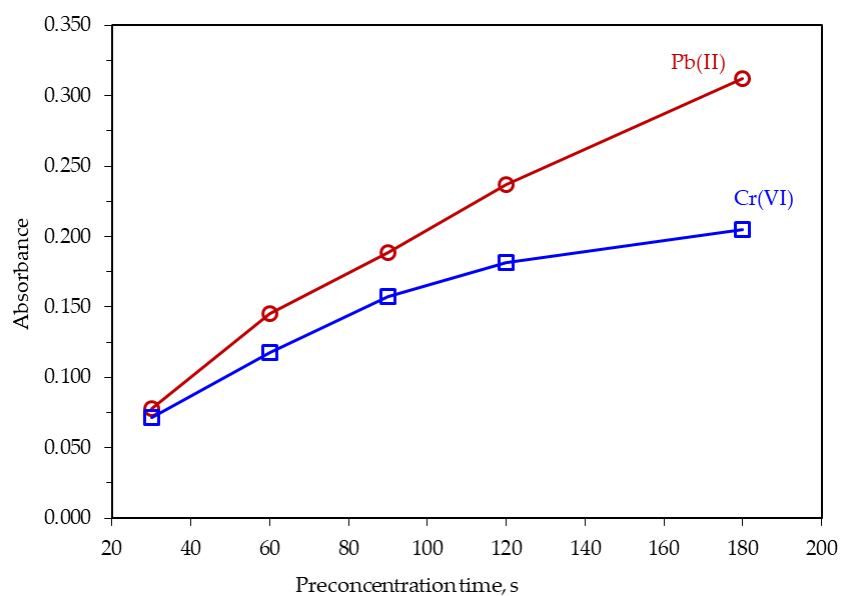

**Figure S5.** Effect of preconcentration time on the absorbance of 100.0  $\mu\text{g}\cdot\text{L}^{-1}$  Pb(II) and 100.0  $\mu\text{g}\cdot\text{L}^{-1}$  Cr(VI). All other experimental parameters as in Table 1.
